# Supplementary material
Source: PubMed Central journal article supplement (PMC3932451)
Supplement: amiajnl-2013-001612-s1.pdf [file amiajnl-2013-001612-s1.pdf]

## Supplementary Materials:

**Table S1 Ontologies:** We use 19 ontologies from UMLS, BioPortal and elsewhere for building a lexicon for annotation, and for normalizing drugs and diseases.

| UMLS        |                                                                                        |
|-------------|----------------------------------------------------------------------------------------|
| CPT         | Current Procedural Terminology, 2011                                                   |
| CST         | COSTART, 1995                                                                          |
| HCPCS       | Healthcare Common Procedure Coding System, 2011                                        |
| ICD10CM     | International Classification of Diseases, 10th Edition, Clinical Modification, 2011_01 |
| ICD9CM      | International Classification of Diseases, Ninth Revision, Clinical Modification, 2012  |
| LNC         | LOINC, 236                                                                             |
| MDR         | Medical Dictionary for Regulatory Activities Terminology (MedDRA), 14.0                |
| MEDLINEPLUS | MedlinePlus Health Topics, 20110108                                                    |
| MSH         | Medical Subject Headings, 2012_2011_09_09                                              |
| NCI         | NCI Thesaurus, 2011_02D                                                                |
| NDFRT       | National Drug File, 2011_09_06                                                         |
| RXNORM      | RxNorm Vocabulary, 11AA_110906F                                                        |
| SNOMED CT   | SNOMED Clinical Terms, 2011_07_31                                                      |
| UMD         | UMDNS: product category thesaurus, 2011                                                |
| VANDF       | Veterans Health Administration National Drug File, 2011_07_29                          |
| WHO         | WHO Adverse Reaction Terminology, 1997                                                 |
| OMIM        | Online Mendelian Inheritance in Man, 2011_06_08                                        |
| OTHER       |                                                                                        |
| ATC         | Anatomical Therapeutic Classification                                                  |
| DO          | Human Disease Ontology                                                                 |

**Table S2 Terms used to identify drugs and adverse events from EHRs (ddi\_concepts.csv):** Drugs are defined as active ingredients from the RxNorm ontology that are also present in DrugBank and the ATC ontology. To prepare the term list for these active ingredients, we start with the RxNorm concept and include synonyms, trade names and other forms of the drug.

We study 14 adverse events based on the availability of known drug interactions causing them, their population event rate in STRIDE and our ability to successfully detect their presence in text from EHRs. To prepare the term list for adverse events, we start at the UMLS concept that best describes it and—using the *is-a* relationship hierarchy in the SNOMED CT ontology to reach relevant parents and siblings—we gather all terms and their synonyms that define the adverse event.

We then process these sets to remove terms that have multiple meanings that can cause ambiguity, followed by manual curation. The file (ddi\_concepts.csv) lists the final set of terms used to define our set of 1,165 drugs and 14 adverse events.

**S3 Validation results:** Accuracy measures for validating the automated annotation mechanism (compared with curated annotations) as determined using 16 different conditions curated for the i2b2 Obesity NLP reference set and an additional 9 conditions that were manually curated. [Atherosclerotic cardiovascular disease; Gastroesophageal reflux disease; Progressive multifocal leukoencephalopathy; TP – True Positives; FP – False Positives; FN – False Negatives; TN – True Negatives; SENS – Sensitivity; SPEC – Specificity (Recall); PPV – Positive Predictive Value (Precision); F1 – F Measure]

| <b>CONDITION</b>              | <b>TP</b>   | <b>FP</b>  | <b>FN</b>   | <b>TN</b>    | <b>SENS</b> | <b>SPEC</b> | <b>PPV</b>  | <b>F1</b>   |
|-------------------------------|-------------|------------|-------------|--------------|-------------|-------------|-------------|-------------|
| Asthma                        | 161         | 13         | 0           | 1058         | 100%        | 99%         | 93%         | 96%         |
| Atherosclerotic cardiov. dis. | 523         | 78         | 153         | 464          | 77%         | 86%         | 87%         | 82%         |
| Congestive heart failure      | 373         | 32         | 142         | 669          | 72%         | 95%         | 92%         | 81%         |
| Depression                    | 171         | 45         | 5           | 1013         | 97%         | 96%         | 79%         | 87%         |
| Diabetes mellitus             | 740         | 16         | 83          | 390          | 90%         | 96%         | 98%         | 94%         |
| Gallstones/cholecystectomy    | 31          | 1          | 165         | 1039         | 16%         | 100%        | 97%         | 27%         |
| Gastroesophageal reflux dis.  | 178         | 13         | 9           | 1027         | 95%         | 99%         | 93%         | 94%         |
| Gout                          | 134         | 9          | 8           | 1082         | 94%         | 99%         | 94%         | 94%         |
| Hypercholesterolemia          | 275         | 4          | 242         | 707          | 53%         | 99%         | 99%         | 69%         |
| Hypertension                  | 709         | 23         | 202         | 296          | 78%         | 93%         | 97%         | 86%         |
| Hypertriglyceridemia          | 13          | 0          | 15          | 1208         | 46%         | 100%        | 100%        | 63%         |
| Obstructive sleep apnea       | 65          | 2          | 109         | 1055         | 37%         | 100%        | 97%         | 54%         |
| Osteoarthritis                | 139         | 75         | 62          | 954          | 69%         | 93%         | 65%         | 67%         |
| Peripheral vascular disease   | 106         | 21         | 60          | 1049         | 64%         | 98%         | 83%         | 72%         |
| Venous insufficiency          | 23          | 18         | 8           | 1186         | 74%         | 99%         | 56%         | 64%         |
| Obesity                       | 301         | 0          | 195         | 727          | 61%         | 100%        | 100%        | 76%         |
| Myocardial infarction         | 200         | 53         | 115         | 869          | 63%         | 94%         | 79%         | 70%         |
| Venous thrombosis             | 94          | 106        | 5           | 1032         | 95%         | 91%         | 47%         | 63%         |
| Acute renal failure           | 88          | 111        | 11          | 1027         | 89%         | 90%         | 44%         | 59%         |
| Cardiac valve fibrosis        | 14          | 223        | 4           | 996          | 78%         | 82%         | 6%          | 11%         |
| QT prolongation               | 13          | 27         | 4           | 1193         | 76%         | 98%         | 33%         | 46%         |
| Pancytopenia                  | 12          | 2          | 0           | 1223         | 100%        | 100%        | 86%         | 92%         |
| Bladder cancer                | 6           | 2          | 3           | 1226         | 67%         | 100%        | 75%         | 71%         |
| Rhabdomyolysis                | 3           | 0          | 1           | 1233         | 75%         | 100%        | 100%        | 86%         |
| Prog. multif. leukoenc..pathy | 0           | 0          | 0           | 1237         | NA          | NA          | NA          | NA          |
| <b>GRAND TOTAL:</b>           | <b>4372</b> | <b>874</b> | <b>1601</b> | <b>23960</b> | <b>0.74</b> | <b>0.96</b> | <b>0.79</b> | <b>0.71</b> |

**S4 Mapping from adverse event concepts in EHRs to MedDRA codes:** In order to compare our method on EHRs with established methods on FAERS, we use the following mapping from EHR event concepts to MedDRA PTs that are used to code FAERS.

| <b>Event</b>          | <b>MedDRA PT</b>    |
|-----------------------|---------------------|
| Cardiac Arrhythmias   | Arrhythmia          |
| Neutropenia           | Neutropenia         |
| Bradycardia           | Bradycardia         |
| Hypoglycemia          | Hypoglycaemia       |
| Acute Renal Failure   | Renal Failure acute |
| Hyperkalemia          | Hyperkalaemia       |
| Hyperglycemia         | Hyperglycaemia      |
| Nephrotoxicity        | -                   |
| Pancytopenia          | Pancytopenia        |
| Hypokalemia           | Hypokalaemia        |
| Serotonin Syndrome    | Serotonin syndrome  |
| QT Prolongation       | Long QT syndrome    |
| Parkinsonian Symptoms | Parkinsonism        |
| Rhabdomyolysis        | Rhabdomyolysis      |

**S5 Precision-Recall curves showing the values of precision and recall that can be obtained by varying the threshold for  $UOR_{0.25}$  and  $AOR_{0.25}$ , for 10 events** [ $UOR_{0.25}$  – Lower Bound of the Unadjusted Odds Ratio 95% Confidence Interval;  $AOR_{0.25}$  – Lower Bound of the Adjusted Odds Ratio 95% Confidence Interval]

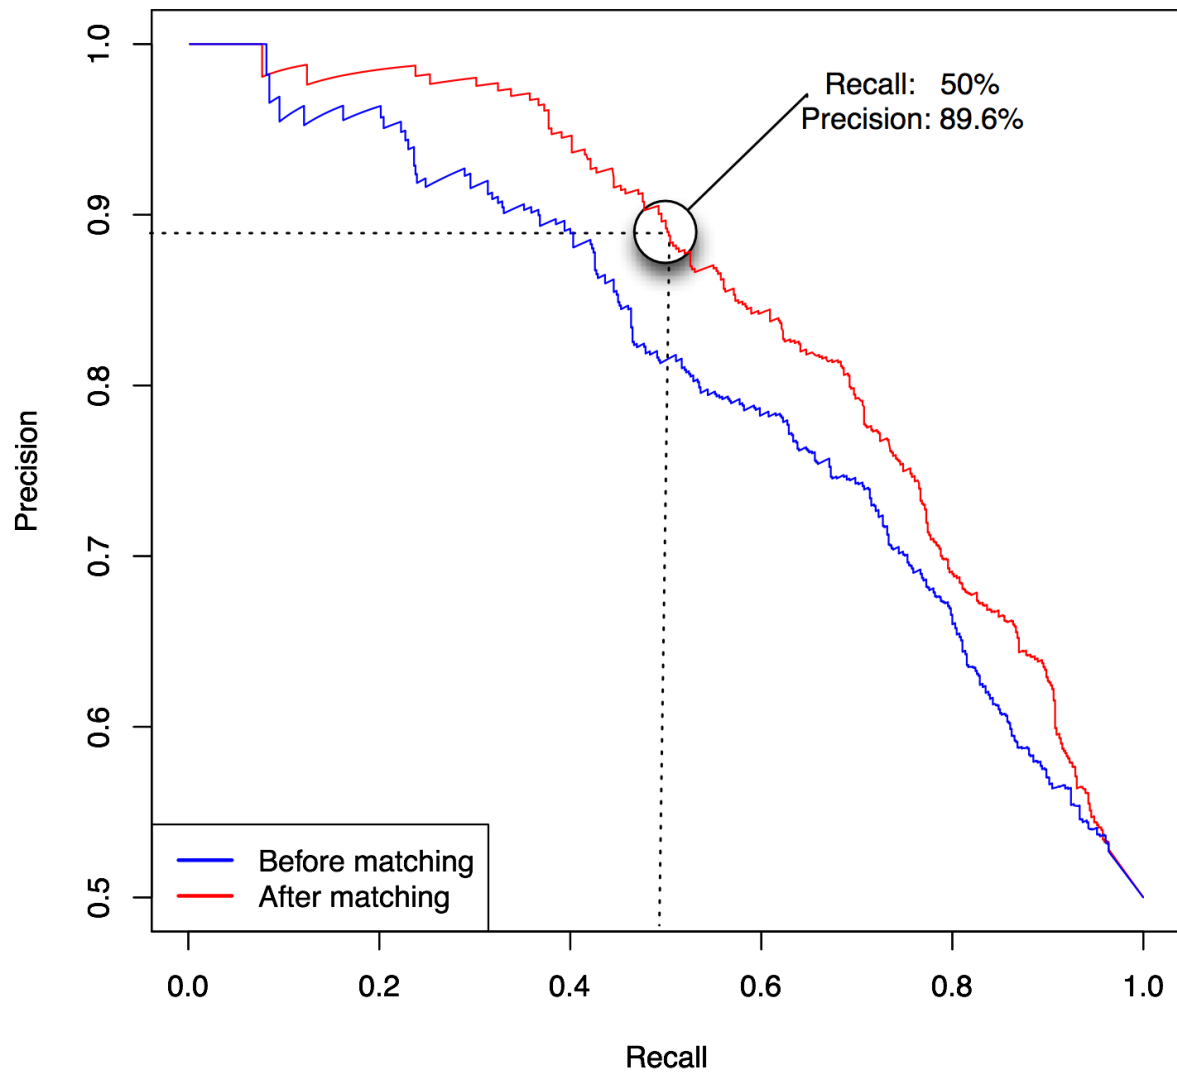

Precision Recall curves for STRIDE using  $UOR_{0.25}$  and  $AOR_{0.25}$ . Adjusting improves performance at all points.

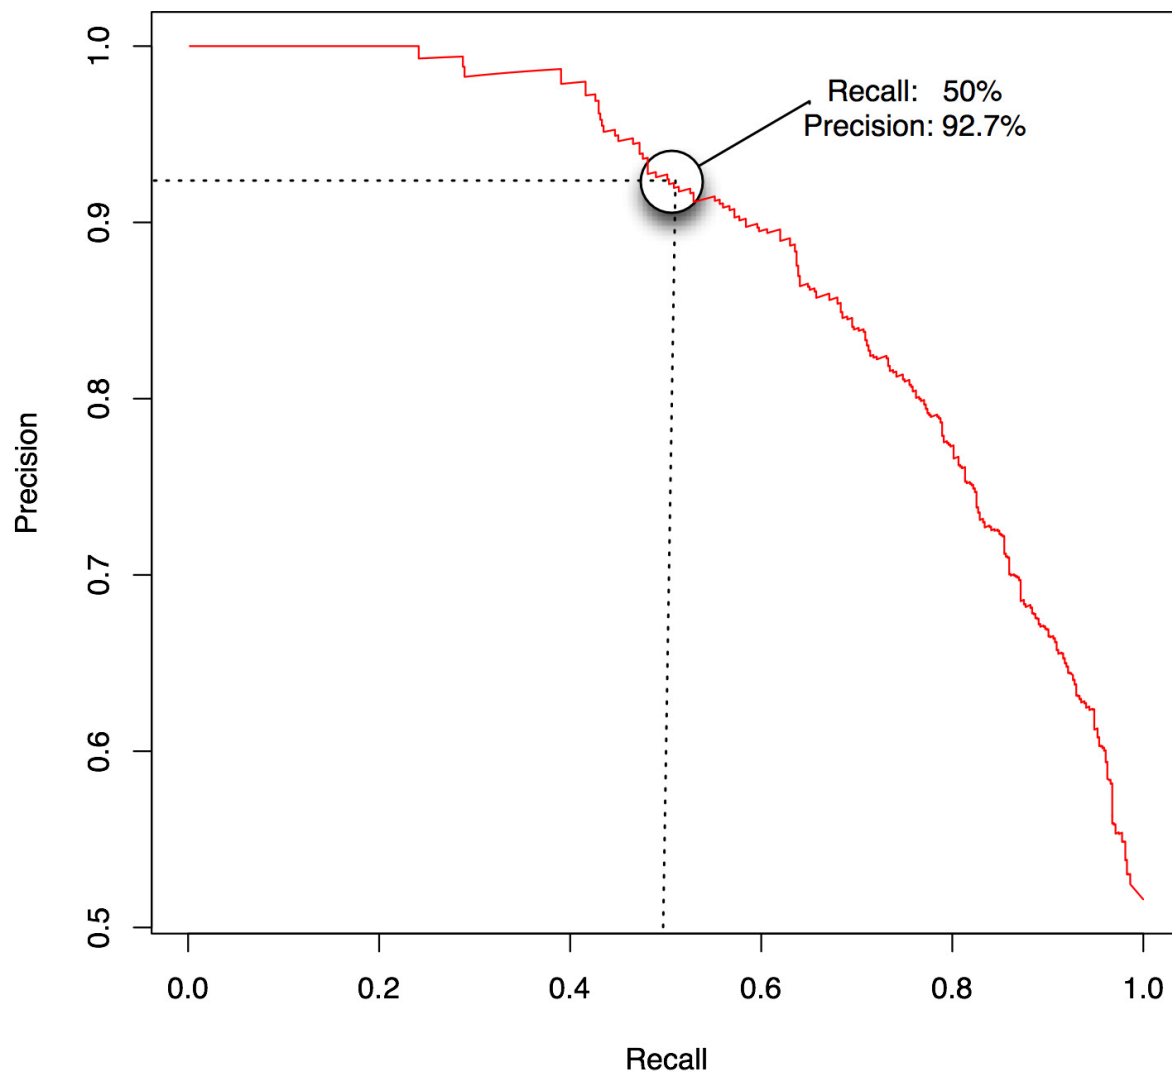

Precision Recall curves for PAMF using  $AOR_{025}$ .

### **S6 Population event rate of all drug-drug-event tuples in our study (event\_rate.csv.tar.gz)**

We provide the 2-by-2 table counts for all drug-drug-event tuples in our study that have an exposure of at least 100 patients, along-with  $UOR_{025}$  and the rate of the event for the drug combination—defined as the fraction of patients on the two drugs, who are subsequently afflicted with the adverse event. We also calculate the  $AOR_{025}$  for those tuples that are signaled positive by EB05 in FAERS (threshold=1.5) and by  $UOR_{025}$  (threshold=4.7) in STRIDE. The 'label' field indicates whether the tuple was used as a positive test case, a negative test case or was unused, in our gold standard.

**S7 New additions to Drugs.com** List of interactions signaled in FAERS (EB05>1.5) and EHRs (UOR<sub>025</sub>> 4.7 and AOR<sub>025</sub>> 1.1) using STRIDE data up to May 2011, that were added into Drugs.com between May 2011 and Nov 2012. [UOR<sub>025</sub> – Lower Bound of the Unadjusted Odds Ratio 95% Confidence Interval; AOR<sub>025</sub> – Lower Bound of the Adjusted Odds Ratio 95% Confidence Interval]

| Adverse Event         | Drug1              | Drug2              | AOR <sub>025</sub> |
|-----------------------|--------------------|--------------------|--------------------|
| hypoglycemia          | levofloxacin       | rosiglitazone      | 3.807794           |
| hypoglycemia          | insulin glargine   | sitagliptin        | 4.210419           |
| hypoglycemia          | gemfibrozil        | rosiglitazone      | 11.33265           |
| hypoglycemia          | metformin          | Orlistat           | 4.662141           |
| pancytopenia          | fludarabine        | alemtuzumab        | 15.75846           |
| serotonin syndrome    | tramadol           | sertraline         | 4.482547           |
| serotonin syndrome    | tramadol           | sumatriptan        | 2.933818           |
| serotonin syndrome    | tramadol           | venlafaxine        | 10.57121           |
| serotonin syndrome    | tramadol           | duloxetine         | 37.77019           |
| serotonin syndrome    | tramadol           | Linezolid          | 1.778889           |
| serotonin syndrome    | sertraline         | sumatriptan        | 15.51812           |
| serotonin syndrome    | sertraline         | venlafaxine        | 8.091355           |
| serotonin syndrome    | sertraline         | duloxetine         | 16.6861            |
| serotonin syndrome    | sertraline         | Linezolid          | 2.539668           |
| serotonin syndrome    | sumatriptan        | venlafaxine        | 9.134166           |
| serotonin syndrome    | sumatriptan        | duloxetine         | 17.03185           |
| serotonin syndrome    | venlafaxine        | duloxetine         | 18.60719           |
| serotonin syndrome    | venlafaxine        | Linezolid          | 8.424942           |
| serotonin syndrome    | duloxetine         | Linezolid          | 7.657865           |
| serotonin syndrome    | duloxetine         | eletriptan         | 14.99389           |
| serotonin syndrome    | clomipramine       | sertraline         | 53.09415           |
| serotonin syndrome    | fluoxetine         | tramadol           | 6.34216            |
| serotonin syndrome    | fluoxetine         | sumatriptan        | 10.39615           |
| serotonin syndrome    | fluoxetine         | venlafaxine        | 10.38797           |
| serotonin syndrome    | fluoxetine         | duloxetine         | 20.14702           |
| serotonin syndrome    | fluoxetine         | Linezolid          | 3.250727           |
| serotonin syndrome    | fluoxetine         | metoclopramide     | 3.759478           |
| serotonin syndrome    | metoclopramide     | sertraline         | 1.39371            |
| serotonin syndrome    | metoclopramide     | venlafaxine        | 3.954983           |
| serotonin syndrome    | amitriptyline      | sertraline         | 9.856795           |
| serotonin syndrome    | amitriptyline      | venlafaxine        | 6.721252           |
| serotonin syndrome    | amitriptyline      | duloxetine         | 20.32482           |
| serotonin syndrome    | amitriptyline      | Linezolid          | 2.302513           |
| serotonin syndrome    | amitriptyline      | fluoxetine         | 5.344813           |
| parkinsonian symptoms | clonazepam         | levodopa           | 188.8748           |
| parkinsonian symptoms | amantadine         | metoclopramide     | 5.418087           |
| parkinsonian symptoms | levodopa           | pramipexole        | 391.2834           |
| parkinsonian symptoms | levodopa           | metoclopramide     | 103.986            |
| cardiac arrhythmias   | digoxin            | dobutamine         | 8.220163           |
| hyperkalemia          | potassium chloride | Lisinopril         | 1.632412           |
| hyperkalemia          | potassium chloride | fosinopril         | 1.308203           |
| hyperkalemia          | benazepril         | Losartan           | 1.329921           |
| hyperkalemia          | lisinopril         | eplerenone         | 1.202691           |
| hyperkalemia          | ramipril           | Losartan           | 2.303345           |
| hyperkalemia          | enalapril          | potassium chloride | 1.279014           |
| hyperkalemia          | enalapril          | triamterene        | 1.339857           |
| hyperkalemia          | enalapril          | Losartan           | 1.424779           |
| hyperkalemia          | enalapril          | Heparin            | 1.220514           |
| hyperkalemia          | heparin            | Lisinopril         | 1.8721             |
